# Supplementary material
Source: bioRxiv or medRxiv preprint supplement (https://www.biorxiv.org/highwire/filestream/23755/field_highwire_adjunct_files/0/085191-1.pdf)
Supplement: Supplementary file [file 085191-1.pdf]

# Supplementary Materials

RNA-protein binding motifs mining with a new hybrid deep learning based cross-domain knowledge integration approach

Xiaoyong Pan and Hong-Bin Shen

## 1 Methods

### 1.1 Identifying binding motifs using iDeep

The CNN module in iDeep is able to detect binding motifs using its filters, which recognize the motif in a set of input sequences [Alipanahi *et al.*,2015, Kelley *et al.*,2016]. For each sequence  $S_m$  and filter with size L, if the activation value  $A_{mfi}$  of filter f at position i is greater than the cut-off, e.g. 0.5, then this sequence in windows L centring the position i is selected. After selecting the motif sequences, WebLogo is used for alignment and visualization.

$$A_{mfi} = ReLU\left(\sum_{l=1}^L \sum_{d=1}^D w_{fld} * s_{m,i+l,d}\right) \quad (1)$$

where  $ReLU(x) = \max(0, x)$ ,  $w_f$  is the weights of filter f, m is the sequence length. D is 4, the dimension of the one-hot encoding of nucleotide sequence.

### 1.2 The architecture of deep belief network

The architecture of DBN for input modalities clip-cobinding, Structure, Region type and Motif are as follows:

1. Fully connected layer
  2. PReLU layer
  3. BatchNormalization layer
  4. Dropout layer
  5. Fully connected layer
  6. PReLU layer
  7. BatchNormalization layer
  8. Dropout layers
- Additional layer for merging outputs from CNNs and DBNs:
9. Fully connected layer
  10. Softmax layer

| Protein    | # of motifs | protein     | # of motifs | protein   | # of motifs |
|------------|-------------|-------------|-------------|-----------|-------------|
| 1 Ago/EIF  | 8           | 12 ESWR1    | 14          | 22 Nsun2  | 15          |
| 2 Ago2M    | 13          | 13 FUS      | 11          | 23 PUM2   | 8           |
| 3 Ago2     | 13          | 14 Mut FUS  | 11          | 24 QKI    | 10          |
| 4 Ago2     | 15          | 15 IGF2.1-3 | 12          | 25 SRSF1  | 7           |
| 5 Ago2     | 8           | 16 hnRNPC   | 6           | 26 TAF15  | 12          |
| 6 eIF4AIII | 8           | 17 hnRNPC   | 10          | 27 TDP-43 | 12          |
| 7 eIF4AIII | 20          | 18 hnRNPL   | 11          | 28 TIA1   | 11          |
| 8 ELAVL1   | 15          | 19 hnRNPL   | 9           | 29 TIAL1  | 13          |
| 9 ELAVL1M  | 11          | 20 hnRNPL1  | 10          | 30 U2AF2  | 13          |
| 10 ELAVL1A | 8           | 21 MOV10    | 13          | 31 U2AF2  | 10          |
| 11 ELAVL1  | 13          |             |             |           |             |

Table S1: The discovered number of known motifs in CISBP-RNA agreeing with 102 filters from CNNs in iDeep for individual experiments.

## 2 Results

### References

- [Alipanahi *et al.*,2015] Alipanahi,B. *et al.* (2015) Predicting the sequence specificities of DNA- and RNA-binding proteins by deep learning. *Nat Biotechnol.* **33**, 831-8.
- [Kelley *et al.*,2016] Kelley,D.R. *et al.* (2016) Basset: learning the regulatory code of the accessible genome with deep convolutional neural networks. *Genome Res.* **3**.
